# Supplementary material for: Unsupervised Exercise Training Was Not Found to Improve the Metabolic Health or Phenotype over a 6-Month Dietary Intervention: A Randomised Controlled Trial with an Embedded Economic Analysis
Source: MDPI journal article supplement (doi:10.3390/ijerph18158004), 2021-07-28
Supplement: s1 [file s1]

**Table S1.** Clinical outcome parameters in each group (mean  $\pm$  SD) at each time point (column 2-3-4) and the corresponding p-value of the change over time (column 5-6-7).

| Clinical outcome parameters     | Baseline        | Month 3         | Month 6         | Change (overtime) |              |             |
|---------------------------------|-----------------|-----------------|-----------------|-------------------|--------------|-------------|
|                                 |                 |                 |                 | month 3           | Month 6      | Month 3     |
|                                 |                 |                 |                 | vs. Baseline      | vs. Baseline | vs. Month 6 |
| <b>BMI (kg/m<sup>2</sup>)</b>   |                 |                 |                 |                   |              |             |
| UC group                        | 32.27 ± 3.50    | 30.27 ± 3.97    | 29.91 ± 4.44    | <0.01             | <0.01        | 0.35        |
| I group                         | 32.98 ± 3.60    | 31.01 ± 3.48    | 31.06 ±3.79     | <0.01             | <0.01        | 0.59        |
| <b>IHL content (/water)</b>     |                 |                 |                 |                   |              |             |
| UC group                        | 4.37 ± 7.49     | 1.79 ± 2.93     | 1.87 ± 2.74     | 0.03              | 0.04         | 0.7         |
| I group                         | 7.08 ± 8.95     | 4.66 ± 8.01     | 3.61 ± 3.63     | 0.06              | 0.05         | 0.73        |
| <b>IMCL (/creatine)</b>         |                 |                 |                 |                   |              |             |
| UC group                        | 7.37 ± 3.82     | 7.31 ± 4.36     | 7.04 ± 4.53     | 0.93              | 0.67         | 0.67        |
| I group                         | 8.10 ± 5.99     | 7.67 ± 6.99     | 8.57 ±3 7.23    | 0.78              | 0.75         | 0.25        |
| <b>VAT (cm<sup>2</sup>)</b>     |                 |                 |                 |                   |              |             |
| UC group                        | 118.78 ± 48.18  | 96.83± 44.77    | 98.91 ± 48.05   | <0.01             | <0.01        | 0.78        |
| I group                         | 115.27 ± 44.89  | 99.63 ± 38.50   | 99.21 ± 47.78   | <0.01             | <0.01        | 0.36        |
| <b>SAT (cm<sup>2</sup>)</b>     |                 |                 |                 |                   |              |             |
| UC group                        | 495.11 ± 113.86 | 439.75 ± 130.13 | 438.65 ± 136.52 | <0.01             | <0.01        | 0.51        |
| I group                         | 490.87 ± 65.62  | 445.33 ± 91.58  | 452.11 ± 99.16  | <0.01             | <0.01        | 0.18        |
| <b>PCF (cm<sup>3</sup>)</b>     |                 |                 |                 |                   |              |             |
| UC group                        | 159.47 ± 55.58  | 148.28 ± 48.49  | 153.65 ± 56.57  | <0.01             | 0.07         | 0.15        |
| I group                         | 150.81 ± 46.94  | 140.59 ± 43.09  | 150.59 ± 55.72  | 0.17              | 0.83         | 0.39        |
| <b>ECF (cm<sup>3</sup>)</b>     |                 |                 |                 |                   |              |             |
| UC group                        | 53.73± 30.32    | 44.00 ± 25.25   | 43.16 ± 26.30   | <0.01             | <0.01        | 0.50        |
| I group                         | 65.36 ± 54.65   | 49.76 ± 45.00   | 49.64 ± 45.89   | <0.01             | <0.01        | 0.20        |
| <b>Body Fat (%)</b>             |                 |                 |                 |                   |              |             |
| UC group                        | 39.16 ± 4.28    | 37.52 ± 5.71    | 37.61 ± 5.54    | 0.01              | 0.15         | 0.64        |
| I group                         | 39.00 ± 3.76    | 37.23 ± 4.71    | 37.95 ± 5.49    | <0.01             | 0.14         | 0.31        |
| <b>Fat free mass (kg)</b>       |                 |                 |                 |                   |              |             |
| UC group                        | 54.78 ± 5.31    | 52.92 ± 5.23    | 51.93 ± 5.54    | <0.01             | <0.01        | 0.34        |
| I group                         | 54.11 ± 6.26    | 52.45 ± 6.28    | 51.46 ± 6.39    | <0.01             | <0.01        | 0.14        |
| <b>Waist circumference (cm)</b> |                 |                 |                 |                   |              |             |
| UC group                        | 100.09 ± 10.13  | 95.23 ± 8.80    | 91.43 ± 9.96    | <0.01             | <0.01        | <0.01       |
| I group                         | 101.28 ± 8.35   | 96.73 ± 9.34    | 94.88 ± 9.07    | <0.01             | <0.01        | 0.09        |
| <b>triglycerides (mg/dL)</b>    |                 |                 |                 |                   |              |             |
| UC group                        | 105.22 ± 69.19  | -               | 84.14 ± 46.88   | -                 | 0.05         | -           |
| I group                         | 99.13 ± 43.19   | -               | 87.32 ± 41.84   | -                 | 0.03         | -           |
| <b>SBP (mmHg)</b>               |                 |                 |                 |                   |              |             |

|                              |                |                |               |      |      |      |
|------------------------------|----------------|----------------|---------------|------|------|------|
| UC group                     | 121.81 ± 14.78 | 120.86 ± 14.10 | 118.05 ± 8.37 | 0.68 | 0.15 | 0.82 |
| I group                      | 120.00 ± 10.34 | 118.20 ± 8.20  | 118.58 ± 8.79 | 0.25 | 0.62 | 0.86 |
| <b>DBP (mmHg)</b>            |                |                |               |      |      |      |
| UC group                     | 72.48 ± 9.94   | 74.43 ± 8.55   | 72.86 ± 6.30  | 0.50 | 0.71 | 0.52 |
| I group                      | 73.93 ± 9.18   | 74.40 ± 6.05   | 75.58 ± 6.01  | 0.93 | 0.32 | 0.82 |
| <b>HDL-C (mg/dL)</b>         |                |                |               |      |      |      |
| UC group                     | 57.19 ± 10.72  | -              | 57.24 ± 13.35 | -    | 0.56 | -    |
| I group                      | 58.63 ± 11.25  | -              | 58.78 ± 10.26 | -    | 0.93 | -    |
| <b>Fast. glucose (mg/dL)</b> |                |                |               |      |      |      |
| UC group                     | 84.56 ± 7.23   | -              | 83.25 ± 8.90  | -    | 0.47 | -    |
| I group                      | 86.30 ± 8.57   | -              | 86.50 ± 15.93 | -    | 0.85 | -    |

*Footnote: Pairwise differences between time points were tested using a Tukey correction for multiple comparisons with significance level of 0.05.*
